# Supplementary material for: Facile construction of 3-indolochromenes and 3-indoloxanthenes via EDDF catalyzed one-pot three component reactions
Source: Royal Society of Chemistry journal article supplement (doi:10.1039/c5nj01288k), 2015-01-01
Supplement: c5nj01288k1.pdf [file c5nj01288k1.pdf]

## Facile construction of 3-indolochromenes and 3-indoloxanthenes via EDDF catalyzed one-pot three component reactions

Anuj Thakur, P. Linga Reddy, Mohit Tripathi and Diwan S. Rawat\*

Department of Chemistry, University of Delhi, Delhi-110007, India

E-mail: dsrawat@chemistry.du.ac.in

## Supplementary Information

### Spectroscopic analysis of reaction-crude (5a) for identification of possible side products

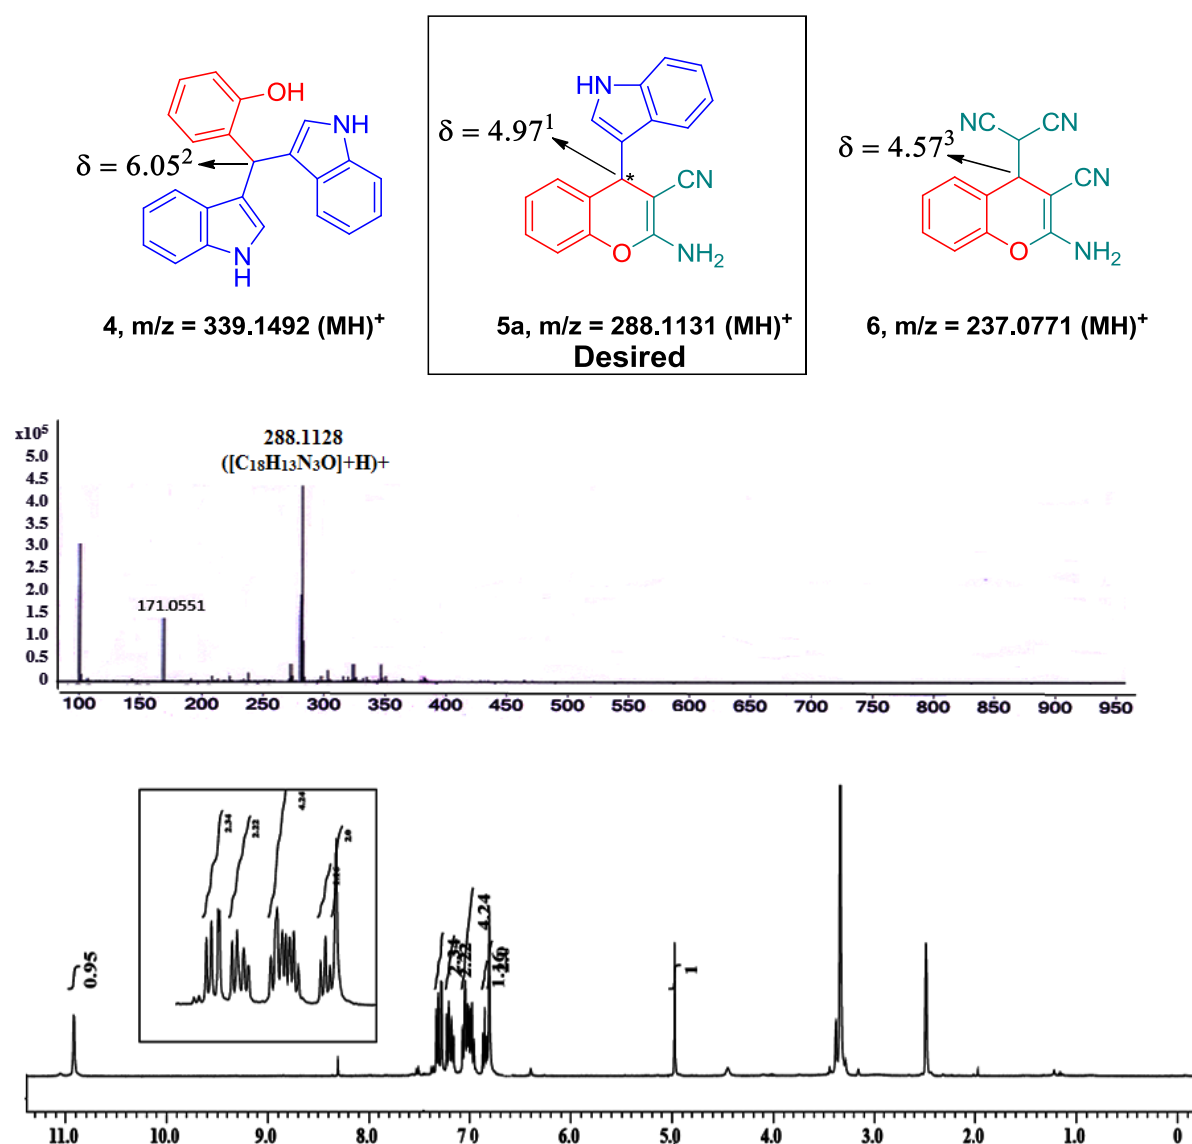

Figure 1: ESI-HRMS and  $^1\text{H}$  NMR spectra of the crude for the synthesis of 3-indolochromene (**5a**) showing no traces of side products

The reaction of salicylaldehyde (**1a**), malononitrile (**2**) and indole (**3a**) could lead to possible formation of side-products **4** and **6** besides the desired 3-indolochromene **5a** (see Scheme 1 in manuscript). The reaction crude was taken and analysed spectroscopically (<sup>1</sup>H NMR and ESI-HRMS) and the data is shown in Figure 1.

By looking at the mass spectrum, the formation of **4** and **6** can be ruled out as there are no peaks at  $m/z$  339.1492 (calcd.  $MH^+$  for **4**) and  $m/z$  237.0771 (calcd.  $MH^+$  for **6**). Also, we can confirm the formation of desired product (**5a**) over side products **4** and **6** by the presence of a characteristic singlet at  $\delta$  4.97,<sup>1</sup> with almost no traces of a singlet at  $\delta$  6.05 or a doublet at  $\delta$  4.57 which are the characteristic peaks of the possible side-products **4**<sup>2</sup> and **6**<sup>3</sup>, respectively, in the <sup>1</sup>H NMR of crude product **5a**.

#### **Spectroscopic analysis of reaction-crude (**8a**) for identification of possible side products**

Following similar line of thought, <sup>1</sup>H NMR and mass spectrum (HRMS) of the reaction crude (**8a**, figure 2) was carefully scrutinized for any possible side-products, which confirmed that only formation of the desired 3-indoloxanthene **8a** took place in the reaction between salicylaldehyde (**1a**), 1,3-cyclohexadione (**7**) and indole (**3a**) (refer scheme 3 in the manuscript). The characteristic peak of the desired product (**8a**,  $\delta$  = 5.34) was observed in the <sup>1</sup>H NMR spectrum (matched with literature data)<sup>4</sup> while no peak at  $\delta$  6.05 for **4** or at  $\delta$  4.64 for formation of **9**<sup>5</sup> was observed. Further, the HRMS spectra exhibited  $MH^+$  peak of only the product **8a** ( $m/z$  = 316.1332;  $MNa^+$  and  $MK^+$  values were also detected) which established the exclusive formation of the desired indolo-xanthene (**8a**).

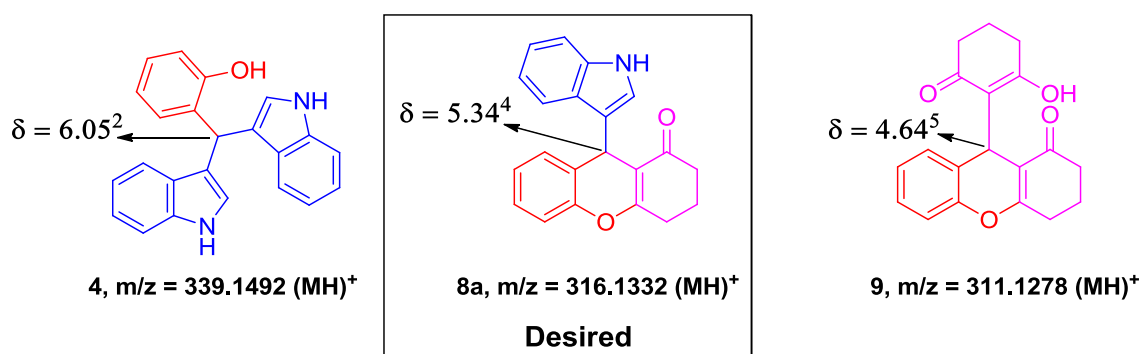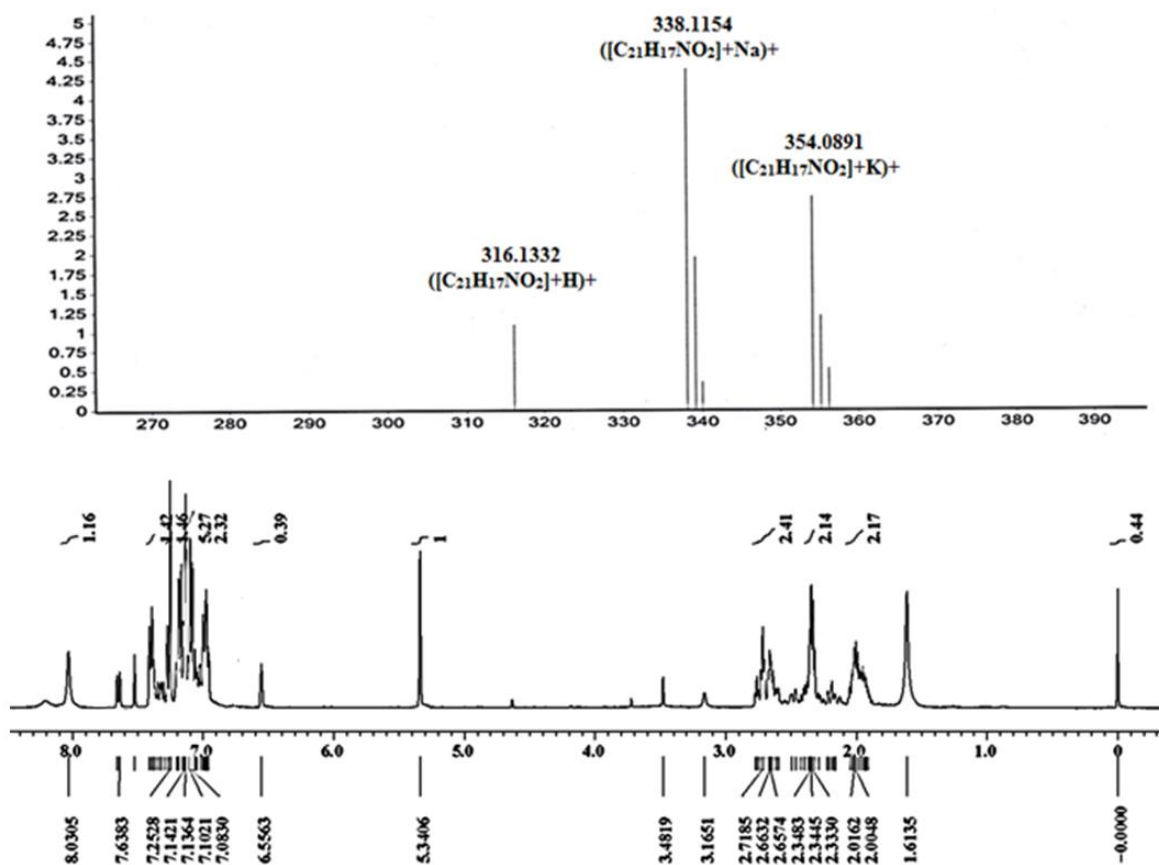

Figure 2: HRMS and <sup>1</sup>H NMR spectra of the crude product for the synthesis of 3-indolochromene (**8a**) showing no traces of side products.

## References

- 1 G. Shanthi, P. T. Perumal, U. Rao and P. K. Sehgal, *Indian J. Chem. B*, 2009, 48, 1319.
- 2 B. Banerjee, S. K. Mandal and S. C. Roy, *Indian J. Chem. B*, 2007, 46B, 669.
- 3 S. Yadav, M. Srivastava, P. Rai, J. Singh, K. P. Tiwari and J. Singh. *New J. Chem.*, 2015, DOI: 10.1039/c5nj00002e.
- 4 U. C. Rajesh, R. Kholiya, A. Thakur and D. S. Rawat, *Tetrahedron Lett.*, 2015, 56, 1790.
- 5 X. Wang, D. Shi, Y. Li, H. Chen, X. Wei, and Z. Zong, *Synth. Commun.*, 2005, 35, 97.
